# Supplementary material
Source: publisher site journal article supplement (https://www.spandidos-publications.com/1290/downloadSupplementary)

Figure S1. Venn diagram of the genes associated with both age-promotion and thyroid cancer.

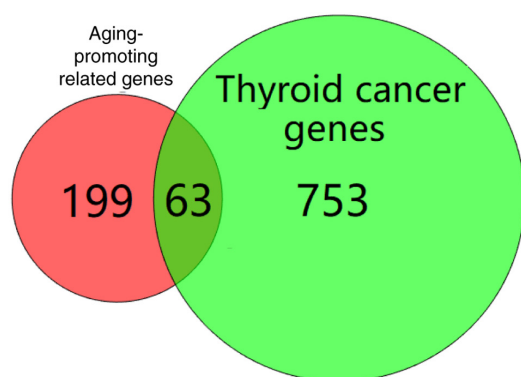

Figure S2. Significant pathways from gene set enrichment analysis results.

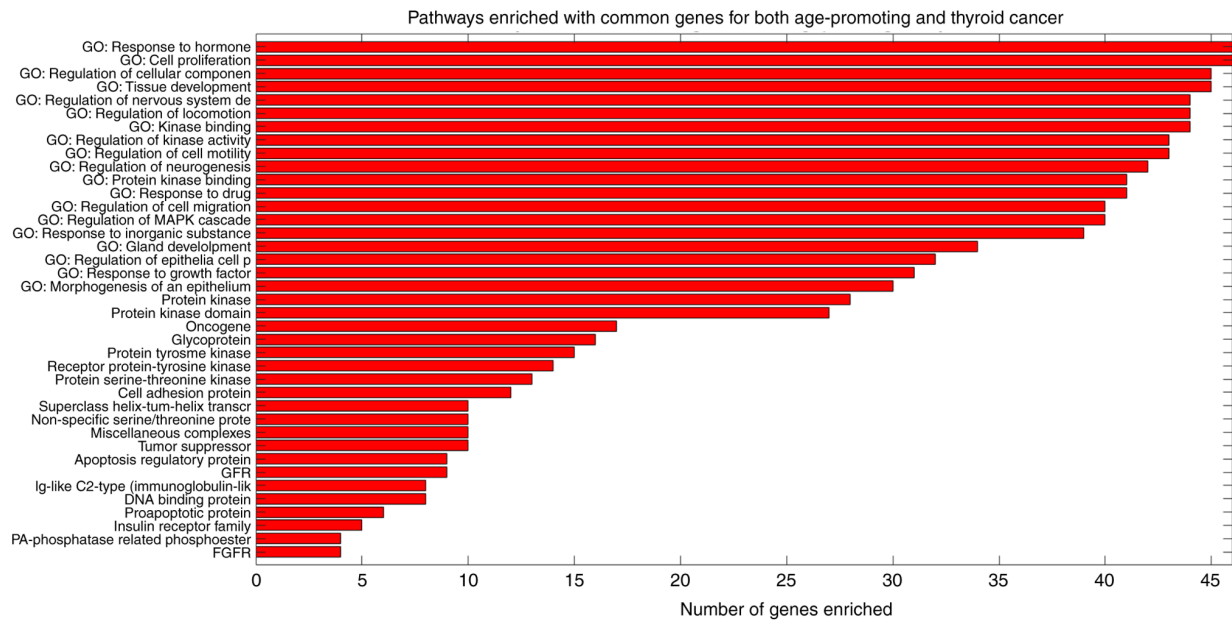

Supplement: Supplementary file 1 [file downloadSupplementary]
